# Supplementary material for: The reactions of α-amino acids and α-amino acid esters with high valent transition metal halides: synthesis of coordination complexes, activation processes and stabilization of α-ammonium acylchloride cations
Source: Royal Society of Chemistry journal article supplement (doi:10.1039/c7ra00073a), 2017-01-01

# The Reactions of $\alpha$ -Amino Acids and $\alpha$ -Amino Esters with High Valent Transition Metal Halides: Synthesis of Coordination Complexes, Activation Processes and Stabilization of $\alpha$ -Ammonium Acylchloride Cations

*Lorenzo Biancalana, Marco Bortoluzzi, Eleonora Ferretti, Mohammad Hayatifar,  
Fabio Marchetti, Guido Pampaloni, and Stefano Zacchini*

## Supporting Information

| <b>Table of contents</b>                                                                                                                                                                                                                                                                                                             | <i>Page</i> |
|--------------------------------------------------------------------------------------------------------------------------------------------------------------------------------------------------------------------------------------------------------------------------------------------------------------------------------------|-------------|
| <b>Figure S1.</b> DFT-optimized geometries of the possible isomers of <b>1b</b> (C-PCM/ $\omega$ B97X calculations) and relative Gibbs energies (kcal mol <sup>-1</sup> ), referred to the [TiCl <sub>4</sub> (phenylalanine)] unit.                                                                                                 | S3          |
| <b>Figure S2.</b> DFT-optimized anions of <b>2a</b> and <b>2b</b> (EDF2 functional) and relative Gibbs energies (kcal mol <sup>-1</sup> ), referred to the [TiCl <sub>4</sub> (amino acidate)] <sup>-</sup> units.                                                                                                                   | S4          |
| <b>Figure S3.</b> ORTEP drawing of [NH <sub>2</sub> <sup>+</sup> Pr <sub>2</sub> ][NbCl <sub>6</sub> ], <b>4</b> . Displacement ellipsoids are at the 50% probability level.                                                                                                                                                         | S5          |
| <b>Figure S4.</b> DFT-optimized cations of <b>9</b> (EDF2 functional) and relative Gibbs energies (kcal mol <sup>-1</sup> ).                                                                                                                                                                                                         | S6          |
| <b>Figure S5.</b> DFT-optimized isomers (EDF2 functional) of NbF <sub>5</sub> (Me <sub>2</sub> CHCH <sub>2</sub> CHNH <sub>2</sub> CO <sub>2</sub> Me) and relative Gibbs energies (kcal mol <sup>-1</sup> ).                                                                                                                        | S7          |
| <b>Figure S6.</b> ORTEP drawing of of the [NbCl <sub>6</sub> ] <sup>-</sup> anion in <b>12</b> . Displacement ellipsoids are at the 50% probability level.                                                                                                                                                                           | S8          |
| <b>Figure S7.</b> DFT-optimized isomers of <b>13</b> (M06 functional) and relative Gibbs energies (kcal mol <sup>-1</sup> ) referred to the mononuclear stoichiometry                                                                                                                                                                | S9          |
| <b>Figure S8.</b> DFT-optimized dinuclear isomers of <b>13</b> (EDF2 functional) and relative Gibbs energies (kcal mol <sup>-1</sup> ) referred to the mononuclear stoichiometry. The EDF2-optimized mononuclear complex was taken as zero. Other dinuclear isomers resulted unstable towards dissociation to mononuclear complexes. | S9          |

**Scheme S1.** Proposed pathway to the formation of complex **3**. M06 calculations, C-PCM implicit solvation model for dichloromethane. Relative Gibbs energies are referred to  $\text{Nb}_2\text{Cl}_9(L\text{-prolinate})_A$  ( $G = 0 \text{ kcal mol}^{-1}$ ). The Gibbs energy variations associated with side-reactions (e.g.  $\text{NbOCl}_3$  polymerisation, interaction of HCl with bases) are not considered. S10

**Table S1A.** Selected bond lengths ( $\text{\AA}$ ) and angles (deg) for **4**. S5

**Table S1B.** Hydrogen bonds ( $\text{\AA}$  and deg) for **4**. S5

**Table S2A.** Selected bond lengths ( $\text{\AA}$ ) and angles (deg) for the  $[\text{NbCl}_6]^-$  anion in **12**. S8

**Table S2B.** Hydrogen bonds ( $\text{\AA}$  and deg) in **12**. S8

**Figure S1.** DFT-optimized geometries of the possible isomers of **1b** (C-PCM/ $\omega$ B97X calculations) and relative Gibbs energies (kcal mol<sup>-1</sup>), referred to the [TiCl<sub>4</sub>(phenylalanine)] unit.

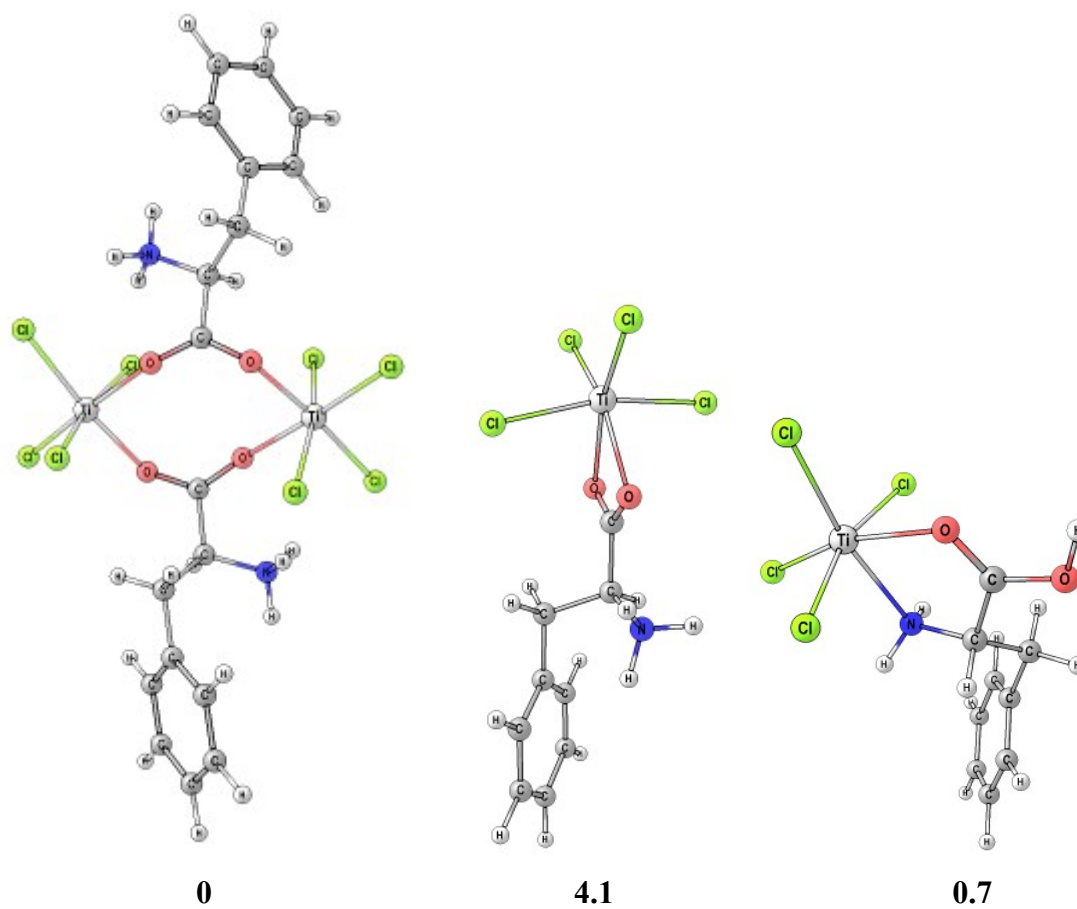

**Figure S2.** DFT-optimized anions of **2a** and **2b** (EDF2 functional) and relative Gibbs energies (kcal mol<sup>-1</sup>), referred to the [TiCl<sub>4</sub>(amino acidate)]<sup>-</sup> units.

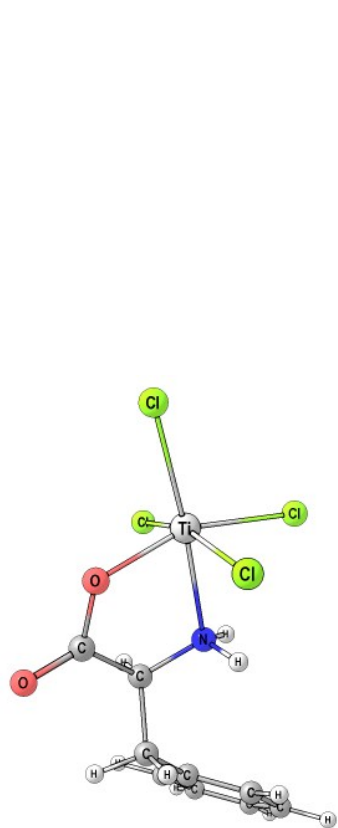

**2a**

**0**

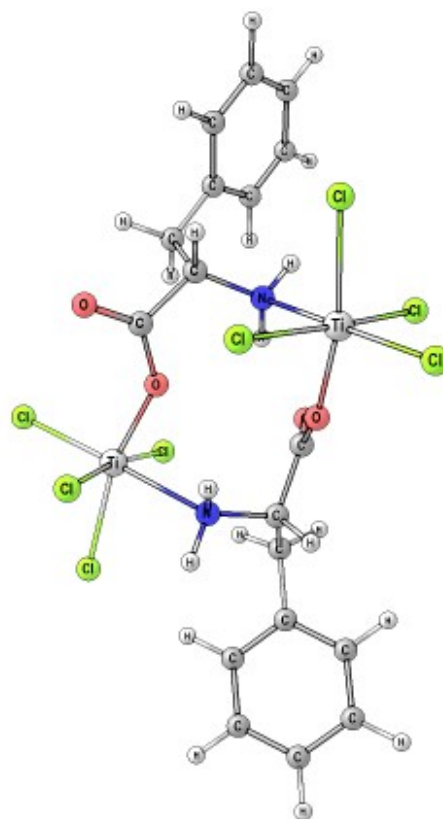

**33.3**

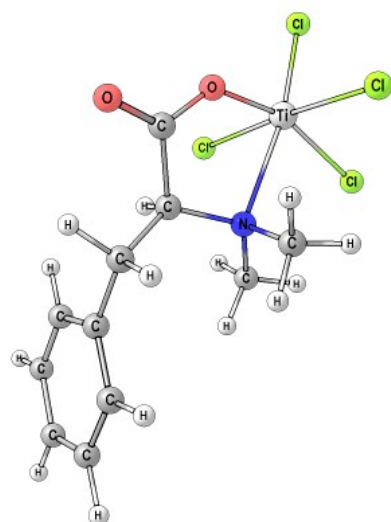

**2b**

**0**

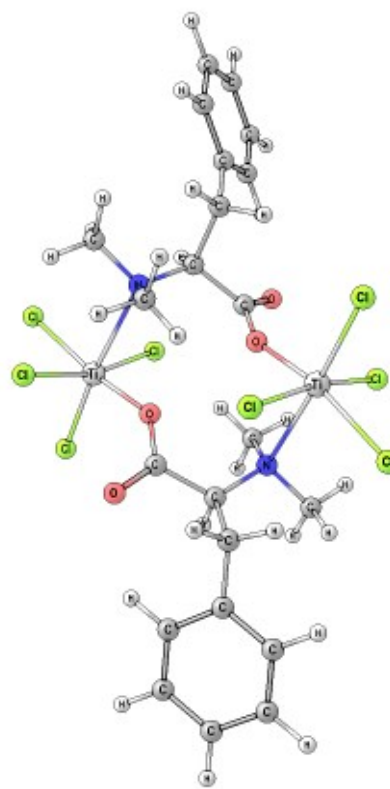

**43.1**

**Figure S3.** ORTEP drawing of  $[\text{NH}_2\text{Pr}_2][\text{NbCl}_6]$ , **4**. Displacement ellipsoids are at the 50% probability level.

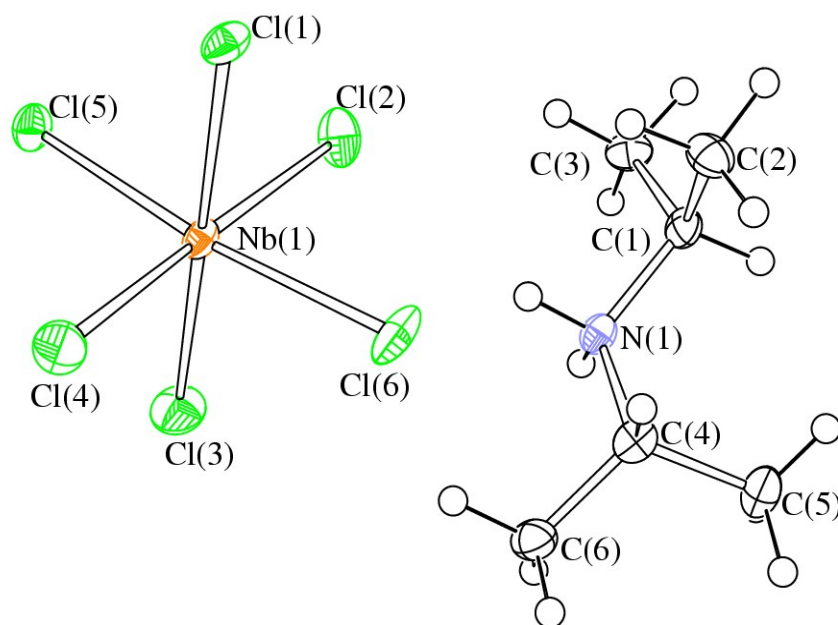

**Table S1A.** Selected bond lengths (Å) and angles (deg) for **4**.

|                   |            |                   |            |
|-------------------|------------|-------------------|------------|
| Nb(1)–Cl(1)       | 2.3927(12) | Nb(1)–Cl(2)       | 2.3944(13) |
| Nb(1)–Cl(3)       | 2.3145(13) | Nb(1)–Cl(4)       | 2.3082(13) |
| Nb(1)–Cl(5)       | 2.3299(12) | Nb(1)–Cl(6)       | 2.3663(13) |
| N(1)–C(1)         | 1.512(5)   | N(1)–C(4)         | 1.518(5)   |
| C(1)–C(2)         | 1.512(6)   | C(1)–C(3)         | 1.514(6)   |
| C(4)–C(5)         | 1.526(6)   | C(4)–C(6)         | 1.509(6)   |
|                   |            |                   |            |
| Cl(1)–Nb(1)–Cl(3) | 179.70(5)  | Cl(2)–Nb(1)–Cl(4) | 176.93(4)  |
| Cl(5)–Nb(1)–Cl(6) | 173.45(4)  | C(1)–N(1)–C(4)    | 119.0(3)   |

**Table S1B.** Hydrogen bonds (Å and deg) for **4**.

| D–H $\cdots$ A              | d(D–A)    | d(H $\cdots$ A) | d(D $\cdots$ A) | $\angle(\text{DHA})$ |
|-----------------------------|-----------|-----------------|-----------------|----------------------|
| N(1)–H(12) $\cdots$ Cl(1)#1 | 0.920(19) | 2.47(2)         | 3.358(4)        | 162(4)               |
| N(1)–H(12) $\cdots$ Cl(6)#1 | 0.920(19) | 2.84(4)         | 3.412(4)        | 121(3)               |
| N(1)–H(11) $\cdots$ Cl(2)   | 0.919(19) | 2.71(2)         | 3.618(4)        | 168(4)               |

Symmetry transformations used to generate equivalent atoms: #1  $x, -y+1/2, z-1/2$



**Figure S5.** DFT-optimized isomers (EDF2 functional) of  $\text{NbF}_5(\text{Me}_2\text{CHCH}_2\text{CHNH}_2\text{CO}_2\text{Me})$  and relative Gibbs energies ( $\text{kcal mol}^{-1}$ ).

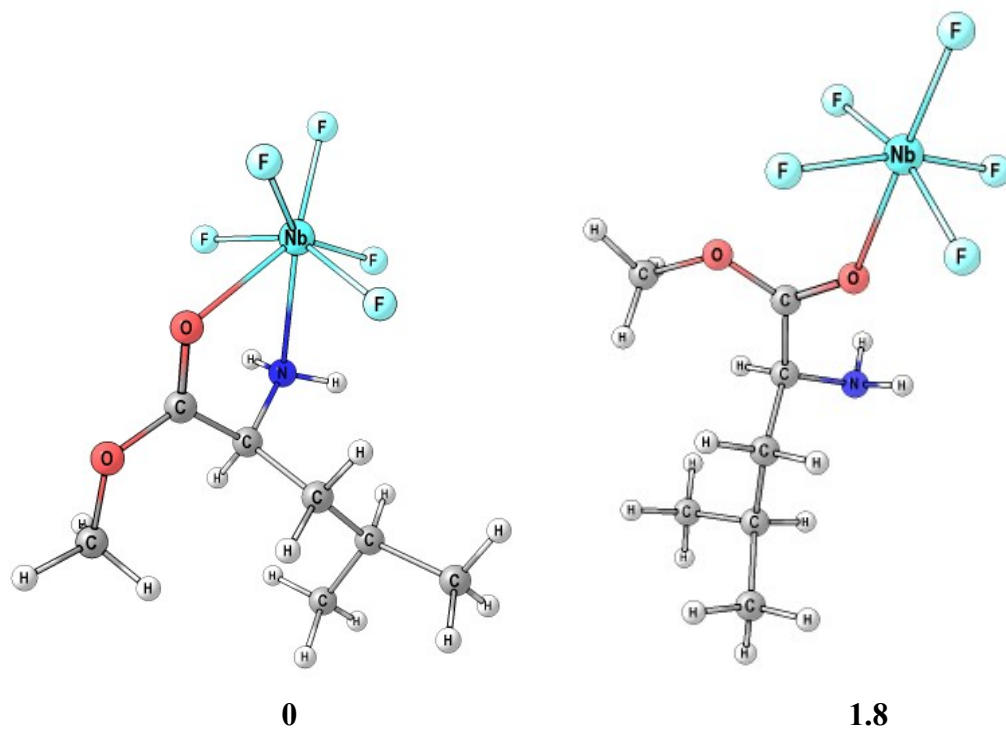

**Figure S6.** ORTEP drawing of of the  $[\text{NbCl}_6]^-$  anion in **12**. Displacement ellipsoids are at the 50% probability level.

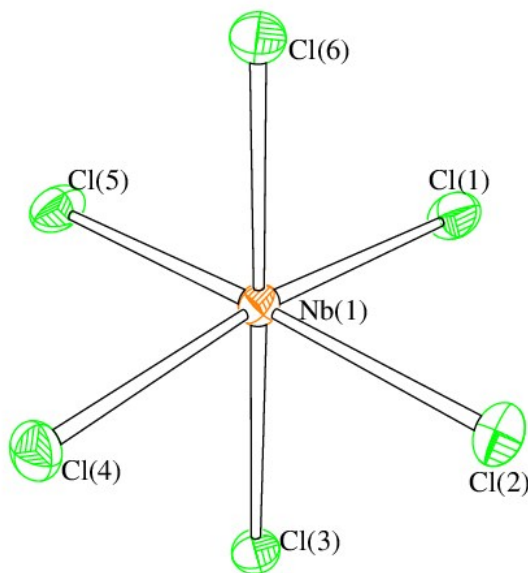

**Table S2A.** . Selected bond lengths (Å) and angles (deg) for the  $[\text{NbCl}_6]^-$  anion of **12**.

|                   |           |                   |           |
|-------------------|-----------|-------------------|-----------|
| Nb(1)–Cl(1)       | 2.3526(9) | Nb(1)–Cl(2)       | 2.3591(9) |
| Nb(1)–Cl(3)       | 2.4307(9) | Nb(1)–Cl(4)       | 2.3670(9) |
| Nb(1)–Cl(5)       | 2.3388(9) | Nb(1)–Cl(6)       | 2.2825(9) |
|                   |           |                   |           |
| Cl(1)–Nb(1)–Cl(4) | 172.60(3) | Cl(2)–Nb(1)–Cl(5) | 176.49(3) |
| Cl(3)–Nb(1)–Cl(6) | 179.07(4) |                   |           |

**Table S2B.** Hydrogen bonds (Å and deg) for **12**.

| D–H $\cdots$ A              | d(D–A)    | d(H $\cdots$ A) | d(D $\cdots$ A) | $\angle(\text{DHA})$ |
|-----------------------------|-----------|-----------------|-----------------|----------------------|
| N(1)–H(1A) $\cdots$ Cl(4)#1 | 0.915(18) | 2.555(19)       | 3.461(3)        | 171(3)               |
| N(1)–H(1B) $\cdots$ Cl(1)#2 | 0.913(17) | 2.46(2)         | 3.296(3)        | 153(3)               |
| N(1)–H(1B) $\cdots$ Cl(2)#2 | 0.913(17) | 2.89(3)         | 3.335(3)        | 111(2)               |
| N(1)–H(1C) $\cdots$ Cl(3)#3 | 0.892(18) | 2.50(2)         | 3.366(3)        | 163(3)               |

Symmetry transformations used to generate equivalent atoms: #1  $x,y,z+1$  #2  $-x+1,y-1/2,-z+1$  #3  $-x+1,y+1/2,-z+1$



**Figure S7.** DFT-optimized isomers of **13** (M06 functional) and relative Gibbs energies (kcal mol<sup>-1</sup>) referred to the mononuclear stoichiometry.

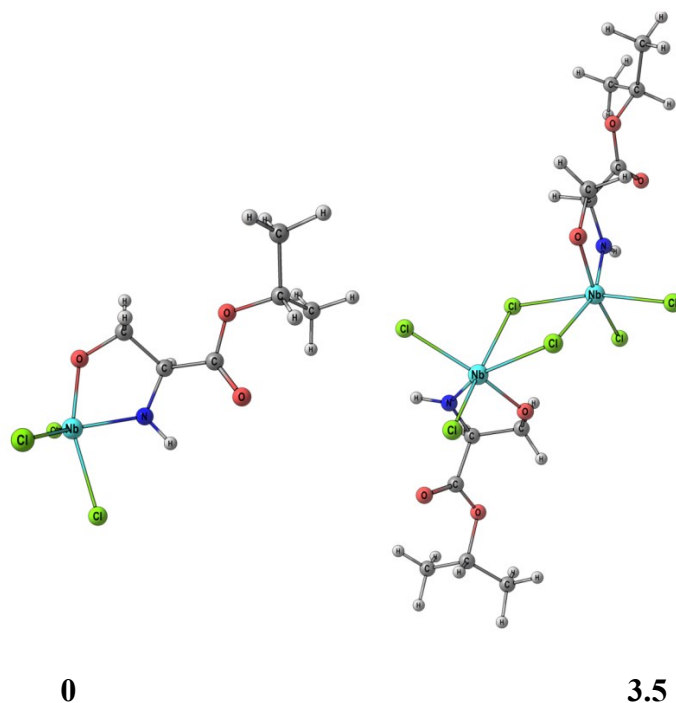

**Figure S8.** DFT-optimized dinuclear isomers of **13** (EDF2 functional) and relative Gibbs energies (kcal mol<sup>-1</sup>) referred to the mononuclear stoichiometry. The EDF2-optimized mononuclear complex was taken as zero. Other dinuclear isomers resulted unstable towards dissociation to mononuclear complexes.

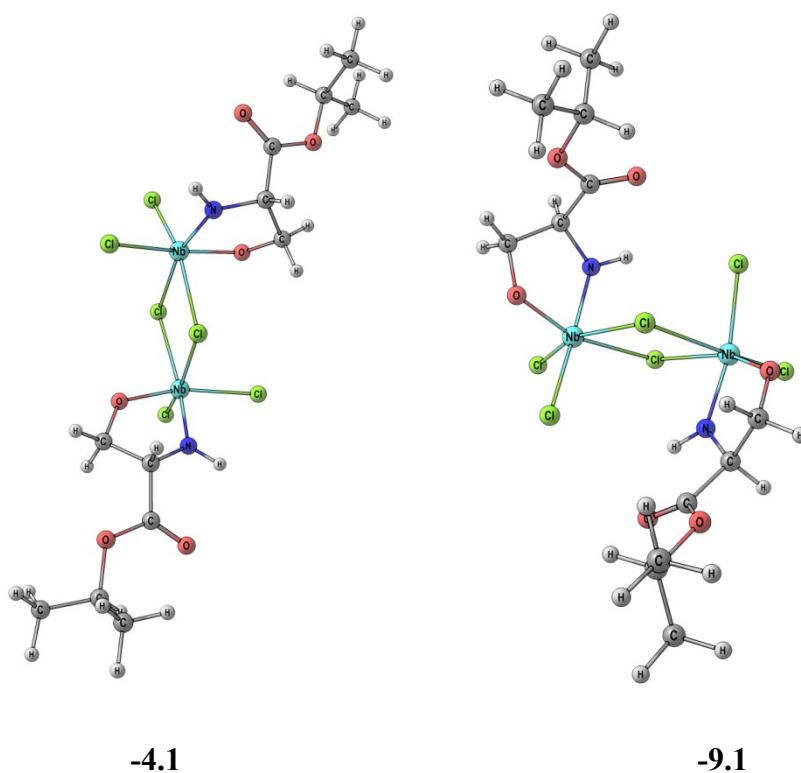

**Scheme S1.** Proposed pathway to the formation of complex **3**. M06 calculations, C-PCM implicit solvation model for dichloromethane. Relative Gibbs energies are referred to  $\text{Nb}_2\text{Cl}_9(\text{L-proline})$ , **A** ( $G = 0 \text{ kcal mol}^{-1}$ ). The Gibbs energy variations associated with side-reactions (e.g.  $\text{NbOCl}_3$  polymerisation, interaction of  $\text{HCl}$  with bases) are not considered.

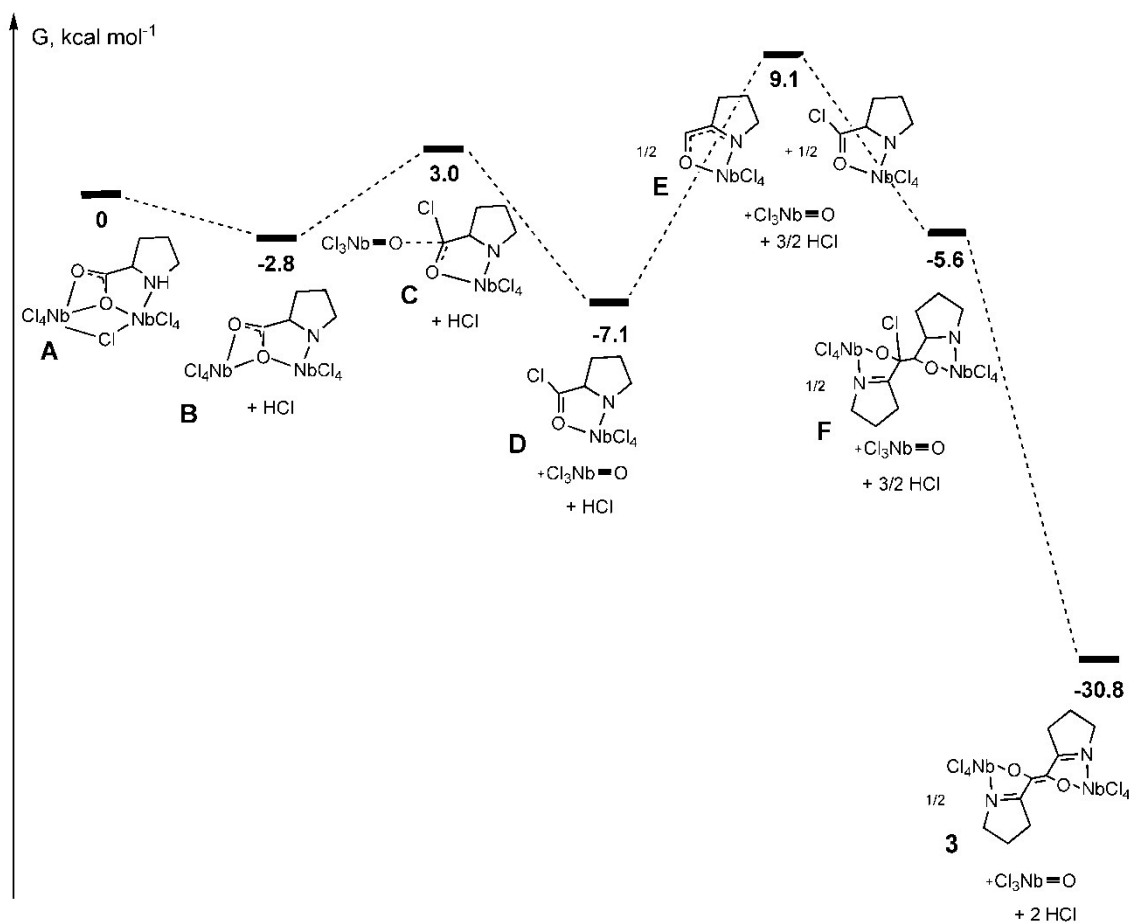

Supplement: c7ra00073a1.pdf [file c7ra00073a1.pdf]
